# Supplementary material for: Dietary Differentiation and the Evolution of Population Genetic Structure in a Highly Mobile Carnivore
Source: PLOS journal article supplement (doi:10.1371/journal.pone.0039341), 2012-06-29

Figure S1. Distributions of posterior estimates of proportional contributions of prey sources in diet of Eastern European wolves inferred from the stable isotope data using MixSIR for: four subpopulations delimited based on mtDNA variability (MIT 1-MIT 4), two subpopulations delimited based on microsatellite variability (NUC 1, NUC 2), and the entire population.

subpopulation MIT 1

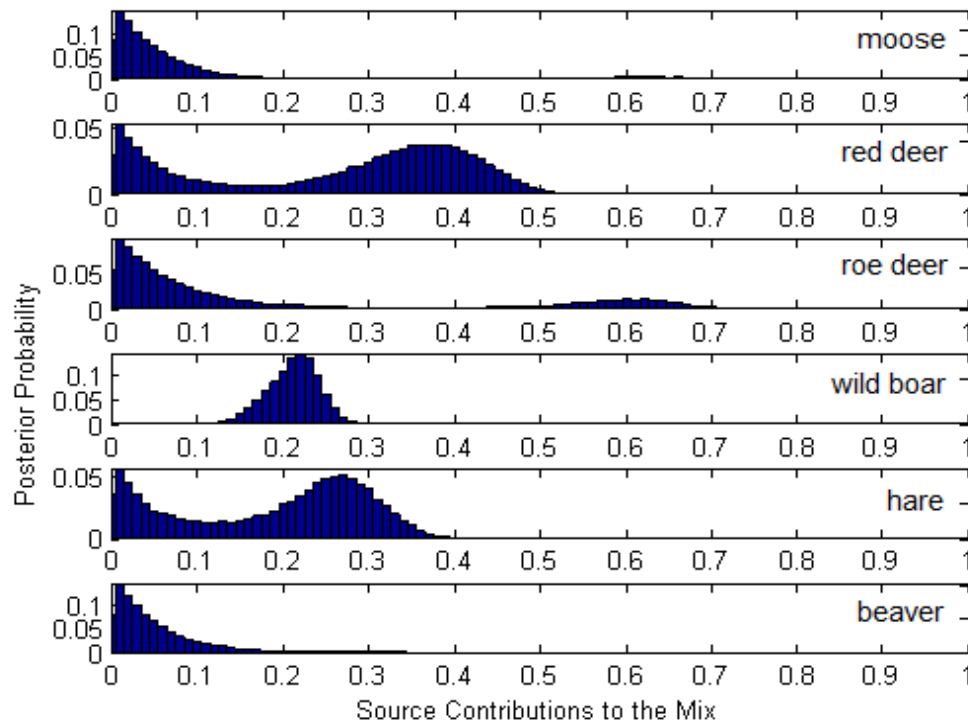

subpopulation MIT 2

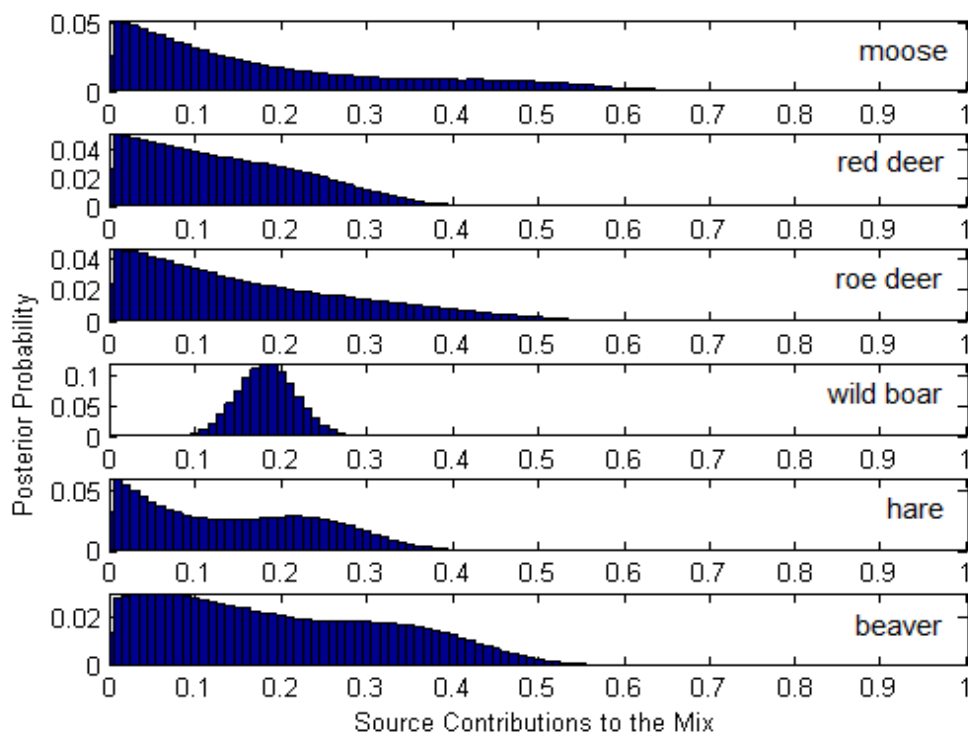

subpopulation MIT 3

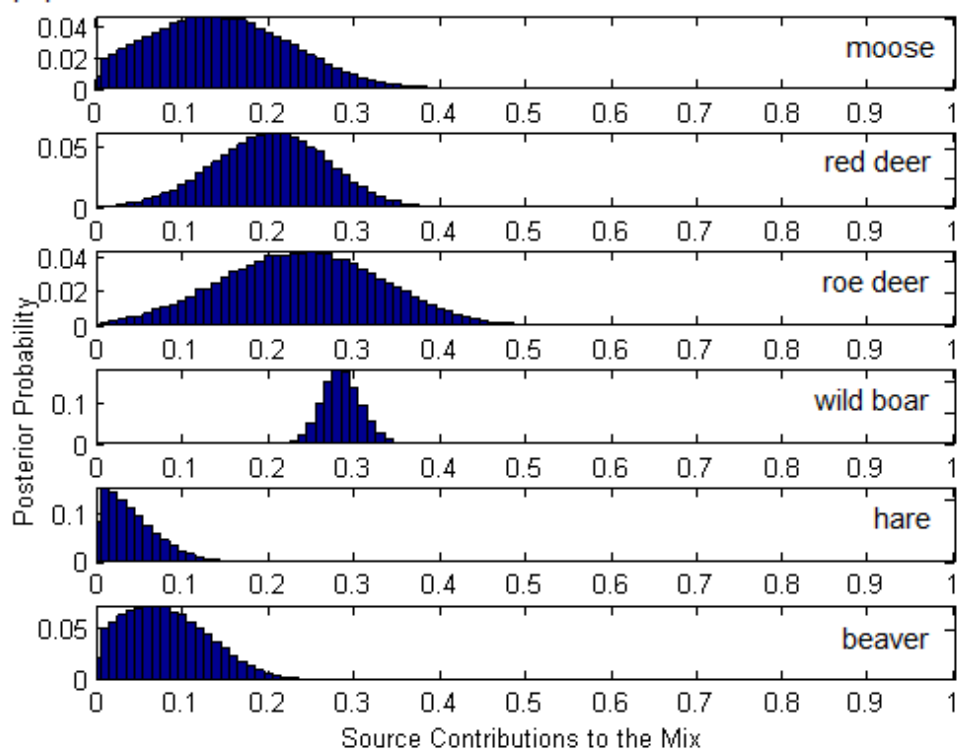

subpopulation MIT 4

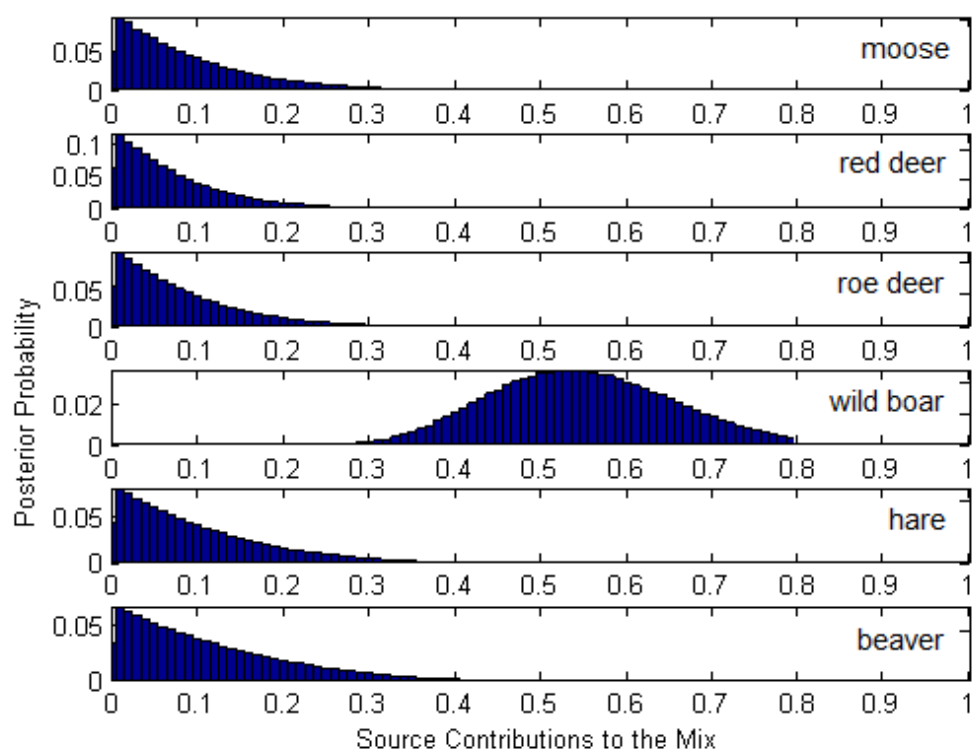

subpopulation NUC 1

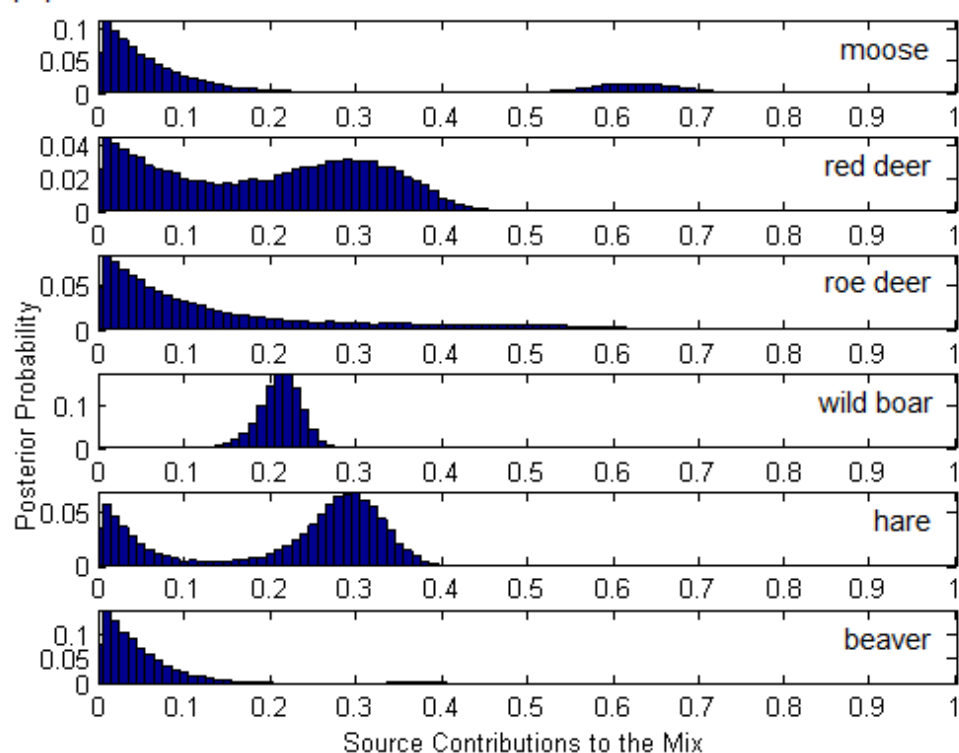

subpopulation NUC 2

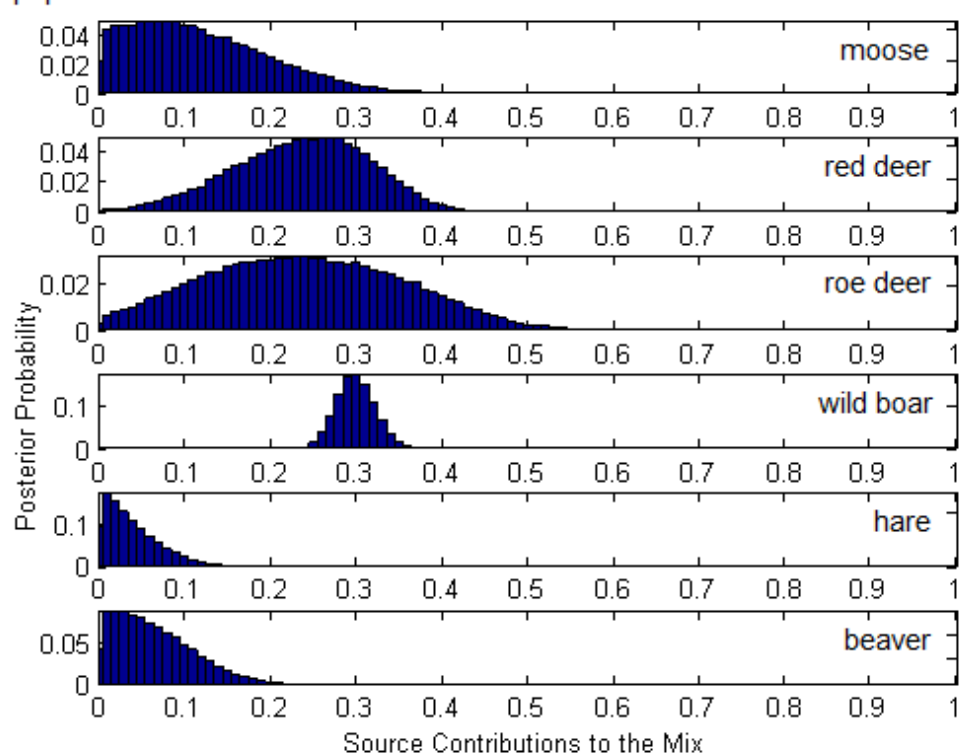

entire population

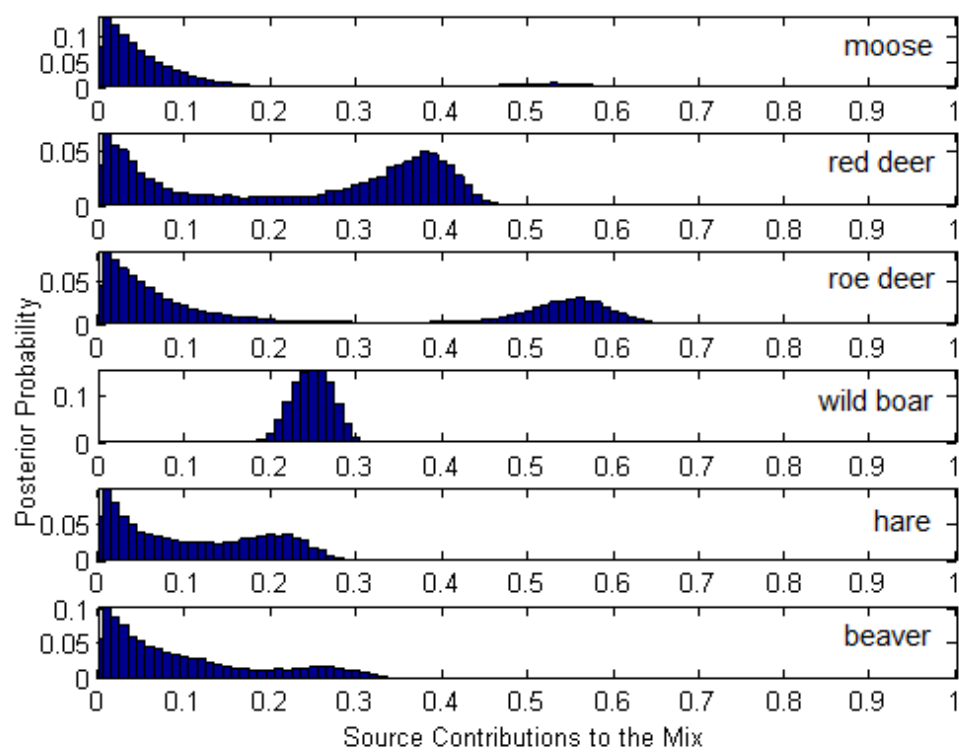

Supplement: S1 (10.1371/journal.pone.0039341.s001) [file journal.pone.0039341.s001]
